# Supplementary material for: Different types of reactions to E7386 among colorectal cancer patient-derived organoids and corresponding CAFs
Source: PubMed Central journal article supplement — Oncol Lett. 2022 May 23;24(1):221. doi: 10.3892/ol.2022.13342 (PMC9178669; doi:10.3892/ol.2022.13342), 2022-05-23

Figure S1. Enriched gene ontology clusters of genes with altered expression levels associated with E7386 concentrations (correlation coefficient >0.7). (A) Upregulated and (B) downregulated genes in organoids. (C) Upregulated and (D) downregulated genes in CAFs. CAFs, cancer-associate fibroblasts.

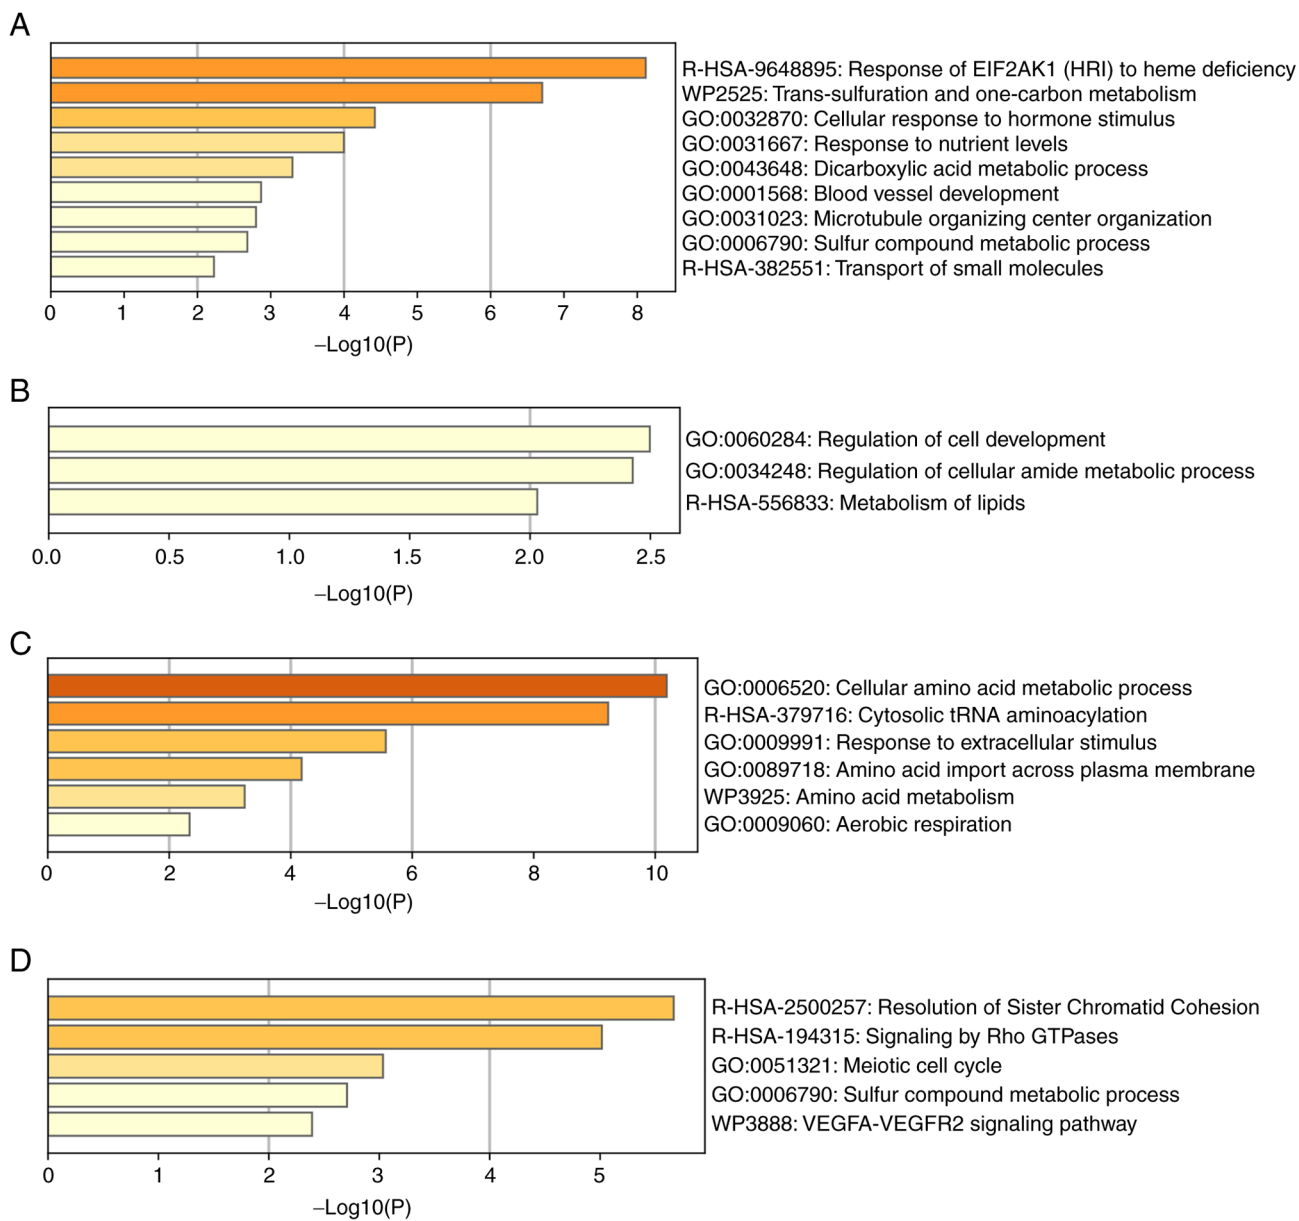

Figure S2. Gene expression changes in organoids and CAFs by E7386 treatment. Volcano plot of the gene expression levels in (A) organoids and (B) CAFs co-cultured with CAFs and organoids, respectively, 24 h after E7386 (100 nM) addition compared with those of control. The y-axis shows the P-value for the differences in gene expression levels by a negative logarithm. The x-axis is the difference in the estimated relative gene expression values. Vertical red lines represent the threshold of the two-fold change, and horizontal red lines represent those of with a significant ( $P < 0.05$ ) change. CAFs, cancer-associate fibroblasts; CHAC1, glutathione-specific  $\gamma$ -glutamylcyclotransferase 1; ULBP1, UL16 binding protein 1; PCK2, phosphoenolpyruvate carboxykinase 2; PSAT1, phosphoserine aminotransferase 1; ASNS, asparagine synthetase (glutamine-hydrolyzing); PHGDH, phosphoglycerate dehydrogenase; GARS, glycyl-tRNA synthetase 1; SMC1A, structural maintenance of chromosomes 1A; SESN2, Sestrin-2; SPC25, SPC25 component of NDC80 kinetochore complex.

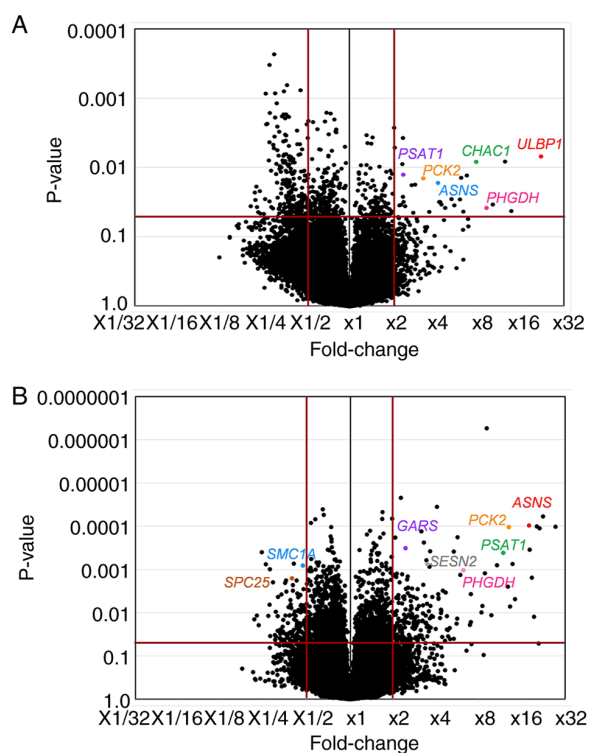

Figure S3. Gene expression changes in organoids and CAFs by E7386 treatment. Heat map showing the gene expression levels in (A) organoids and (B) CAFs 6 and 24 h after E7386 (0, 30 and 100 nM) addition compared with those of control. Data represent normalized, centered and scaled probe intensities on a log<sub>2</sub> scale. CAFs, cancer-associate fibroblasts; CHAC1, glutathione-specific  $\gamma$ -glutamylcyclotransferase 1; ULBP1, UL16 binding protein 1; PCK2, phosphoenolpyruvate carboxykinase 2; PSAT1, phosphoserine aminotransferase 1; ASNS, asparagine synthetase (glutamine-hydrolyzing); PHGDH, phosphoglycerate dehydrogenase; ATAD5, ATPase family AAA domain-containing protein 5; MYBL2, MYB proto-oncogene like 2; ZGRF1, zinc finger GRF-type-containing 1; CCNE2, cyclin E2.

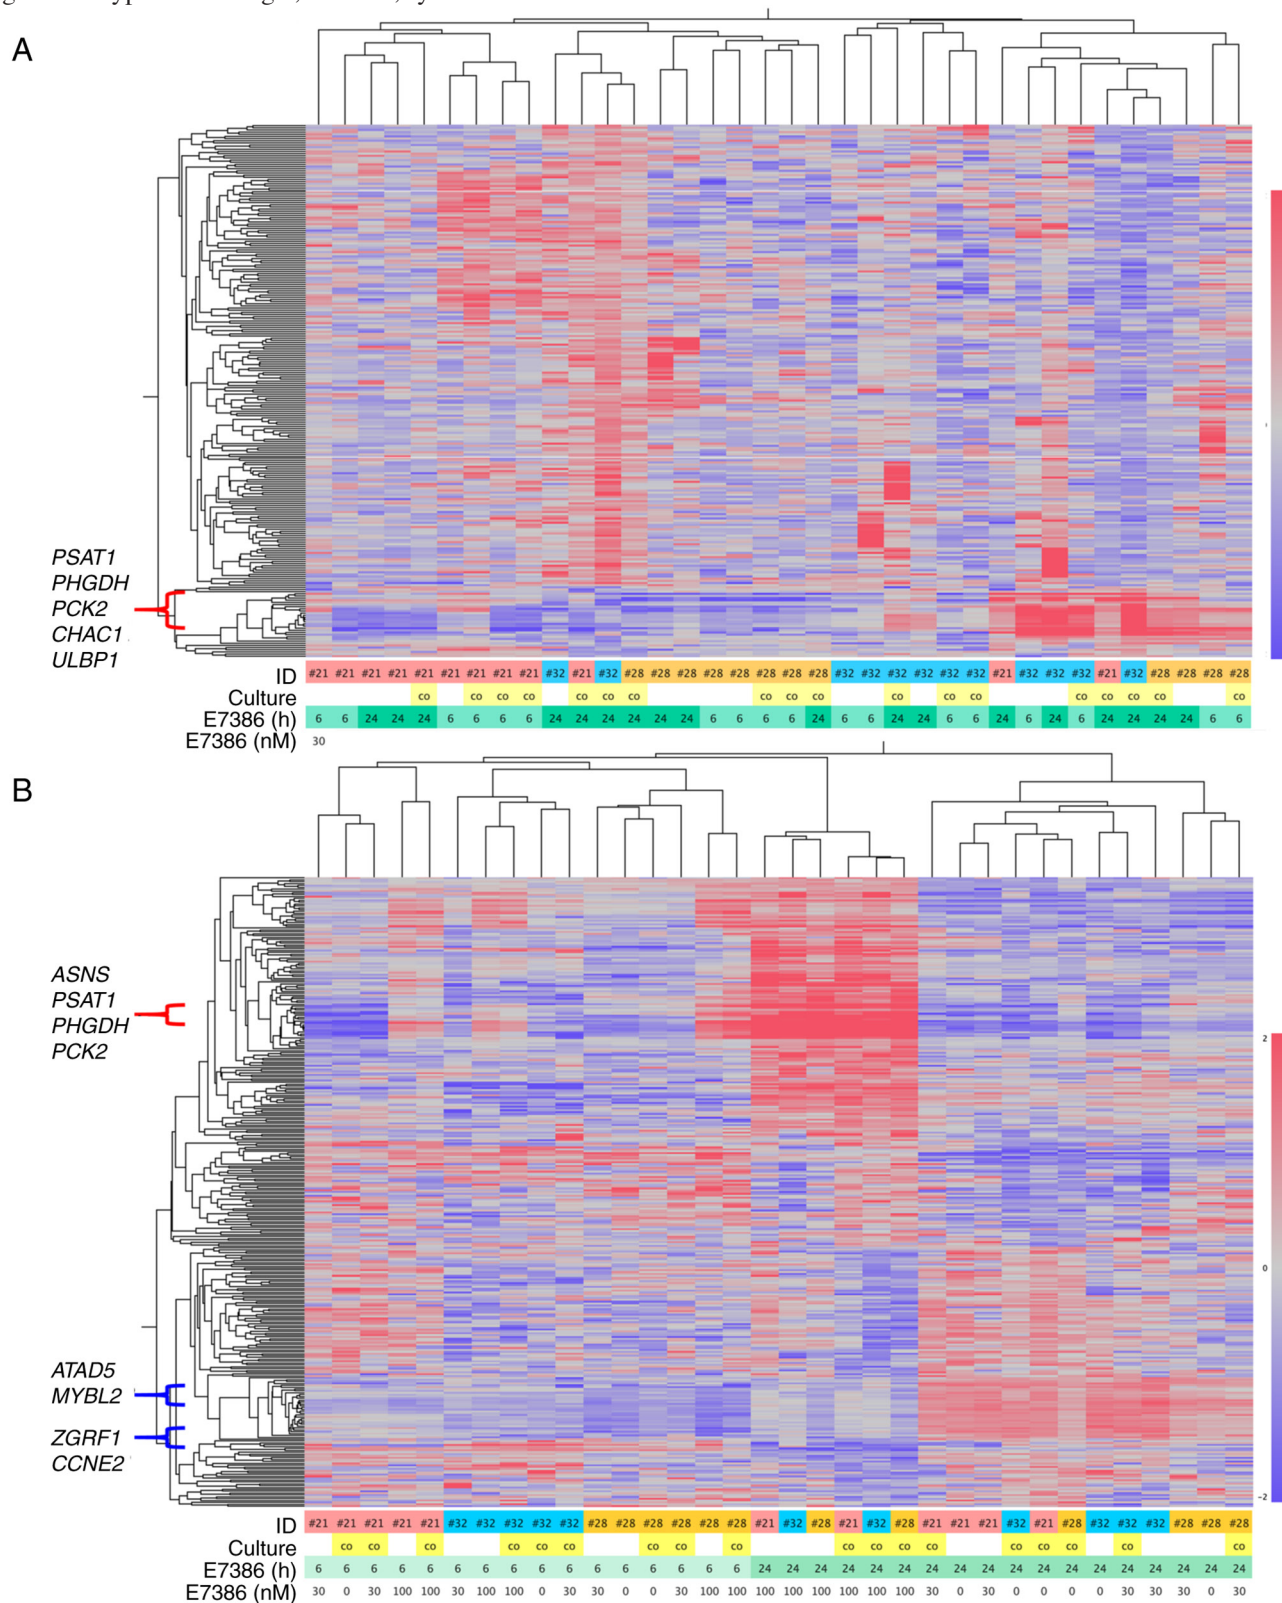



Figure S5. Average changes in the volumes of PDX from cases 21 and 28 after treatment with E7380 twice a day for 14 days. Data are presented as the mean  $\pm$  SD. PDX, patient-derived xenografts.

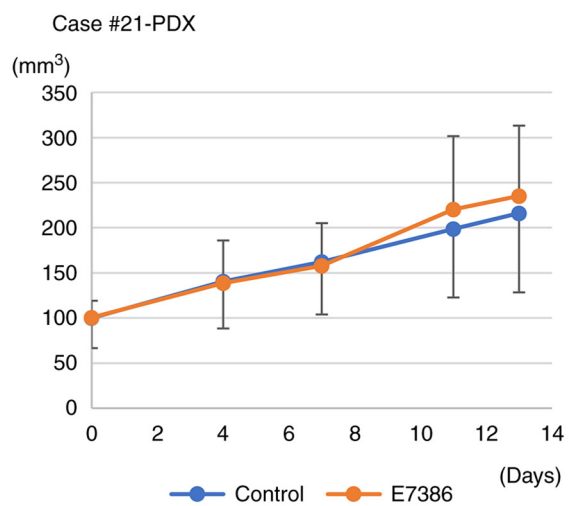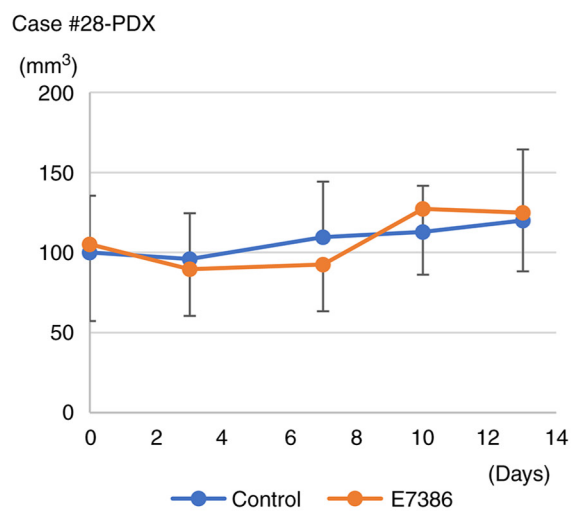

Figure S6. Macroscopic appearance of patient-derived xenografts from cases 21 and 28 after treatment with E7380 twice a day for 14 days. Scale bar, 1 cm. PDX, patient-derived xenografts.

Case #21-PDX

Control

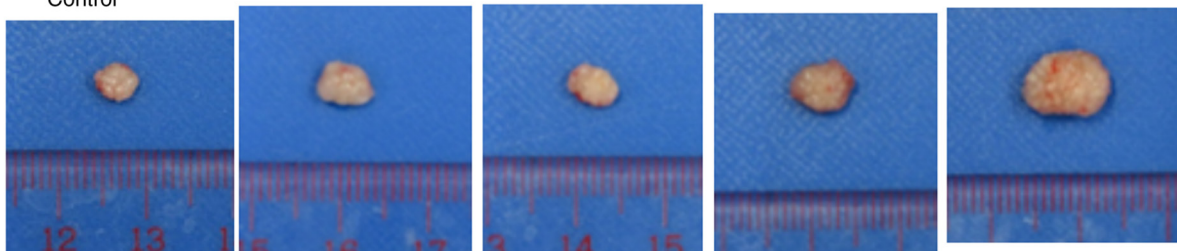

E7386

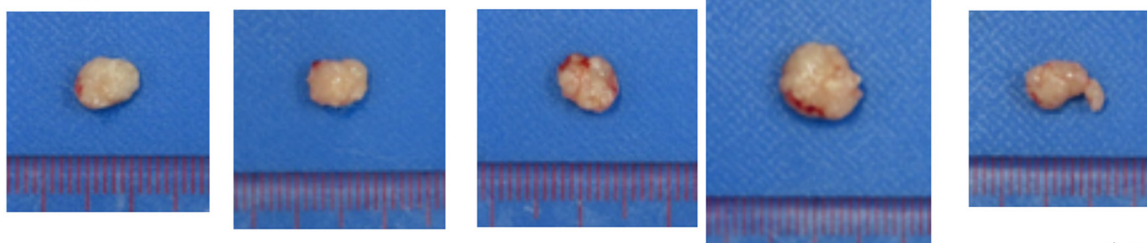

1 cm

Case #28-PDX

Control

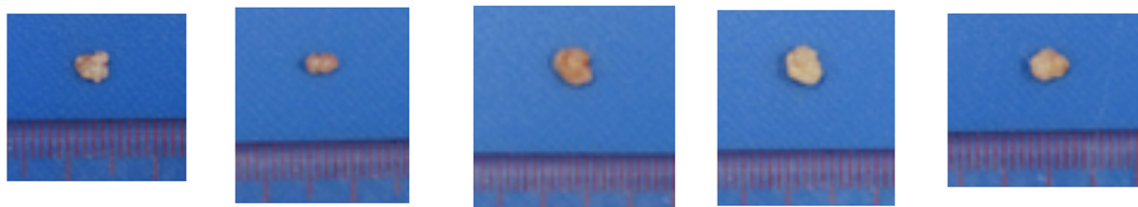

E7386

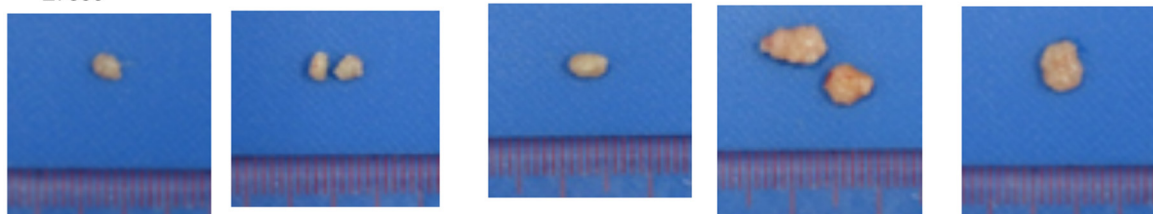

1 cm



Figure S7. Immunoblotting for the expression levels of (A) PCK2 and (B)  $\beta$ -catenin relative to (C)  $\beta$ -actin in PDXs of case 21 treated with E7386 at 0 and 50 mg/kg bodyweight BID for 14 days. Immunoblotting for (D) PCK2 and (E)  $\beta$ -catenin relative to (F)  $\beta$ -actin in PDXs of case 28 treated with E7386 as same as case 21. PCK2, phosphoenolpyruvate carboxykinase 2; PDX, patient-derived xenografts; BID, twice a day.

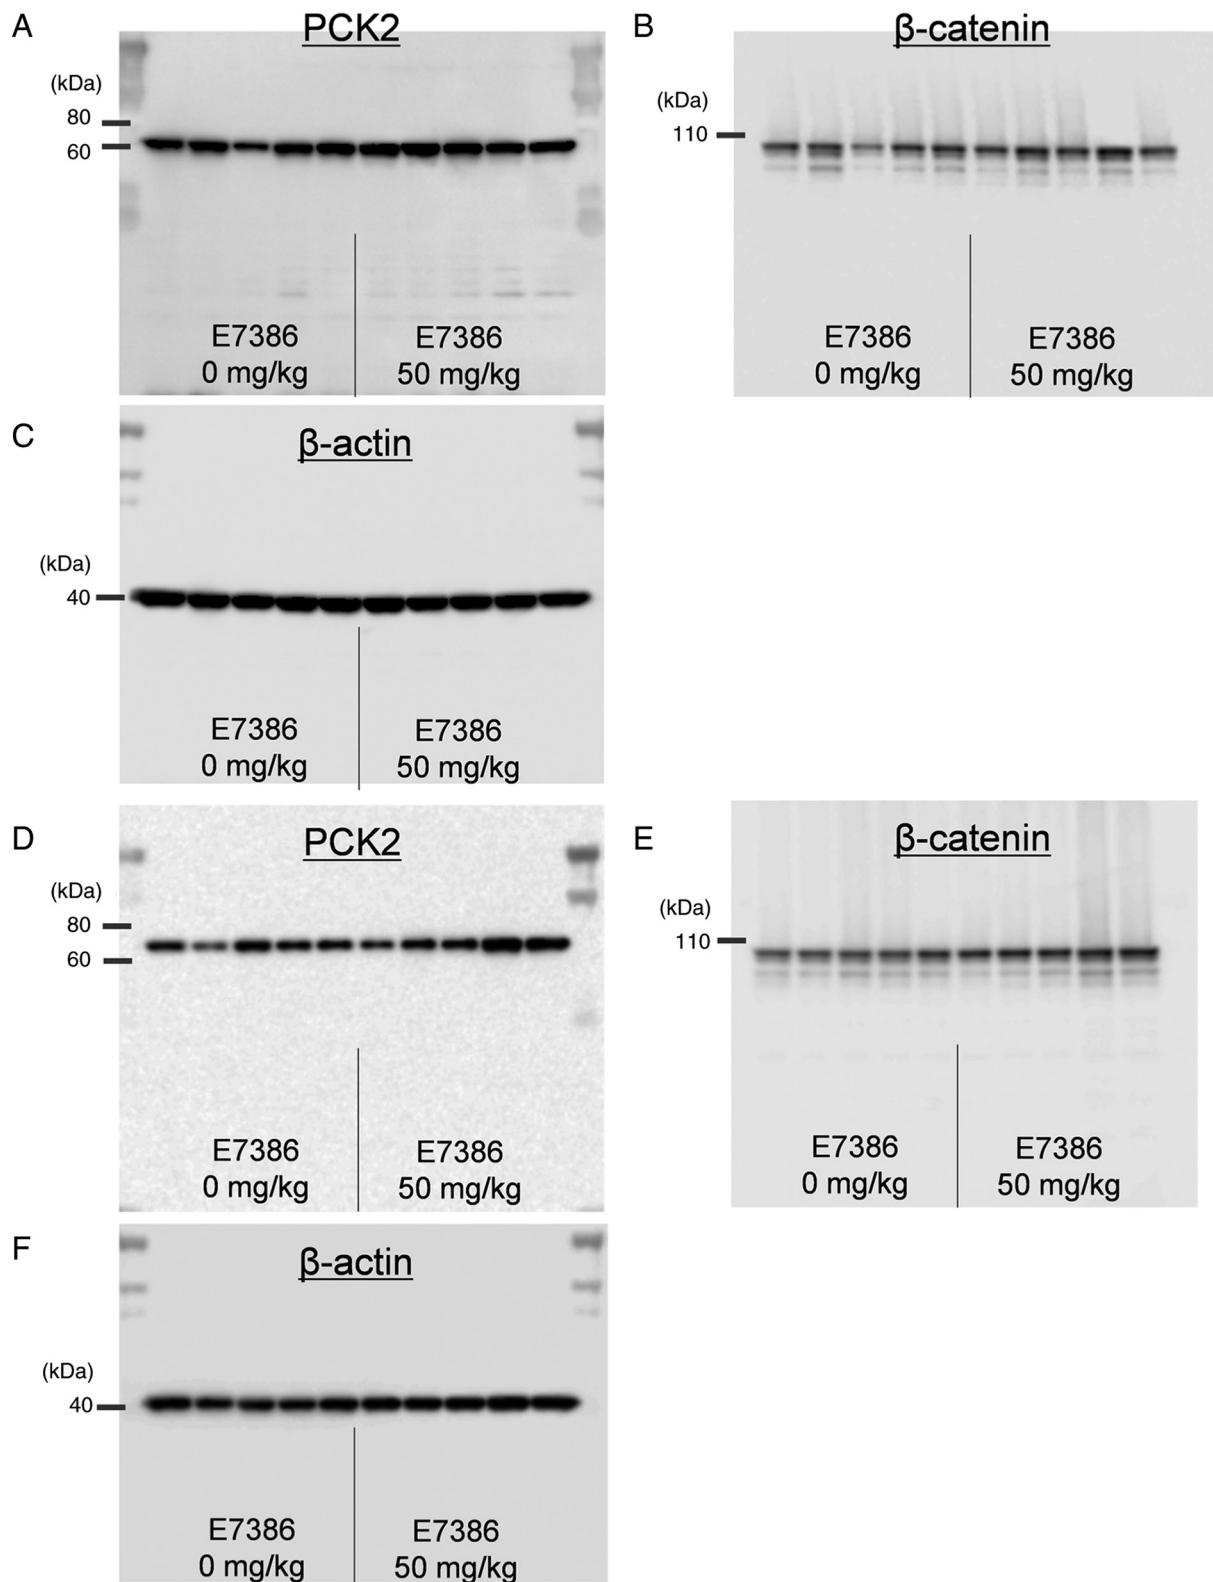

Figure S8. Average (A) PCK2/ $\beta$ -actin ratios and (B)  $\beta$ -catenin/ $\beta$ -actin ratios measured in immunoblotting analysis in PDXs of case 28 treated with E7380 at 0 and 50 mg/kg bodyweight BID for 14 days. Data are presented as the mean  $\pm$  SD. PCK2, phosphoenolpyruvate carboxykinase 2; PDX, patient-derived xenografts; BID, twice a day.

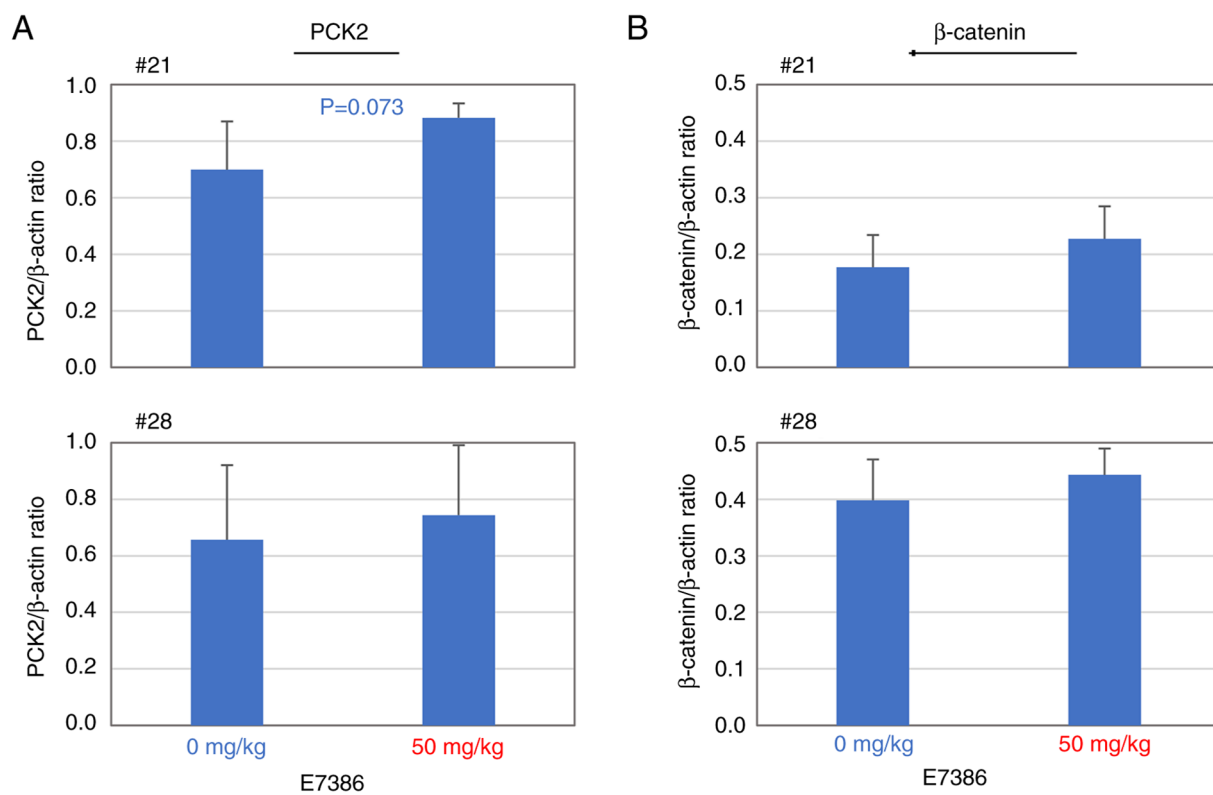



Figure S9. (A) Quantitative imaging analysis of  $\alpha$ SMA expression from immunohistochemistry staining in the PDX treated with E7380 twice a day for 14 days. (B) Immunohistochemistry staining for  $\alpha$ SMA in the PDX of cases 21 and 28 treated with E7380. Scale bars, 50  $\mu$ m. Immunohistochemical staining for case 28 are also presented in Fig. 5D.  $\alpha$ SMA,  $\alpha$ -smooth muscle actin; PDX, patient-derived xenografts; ns, not significant.

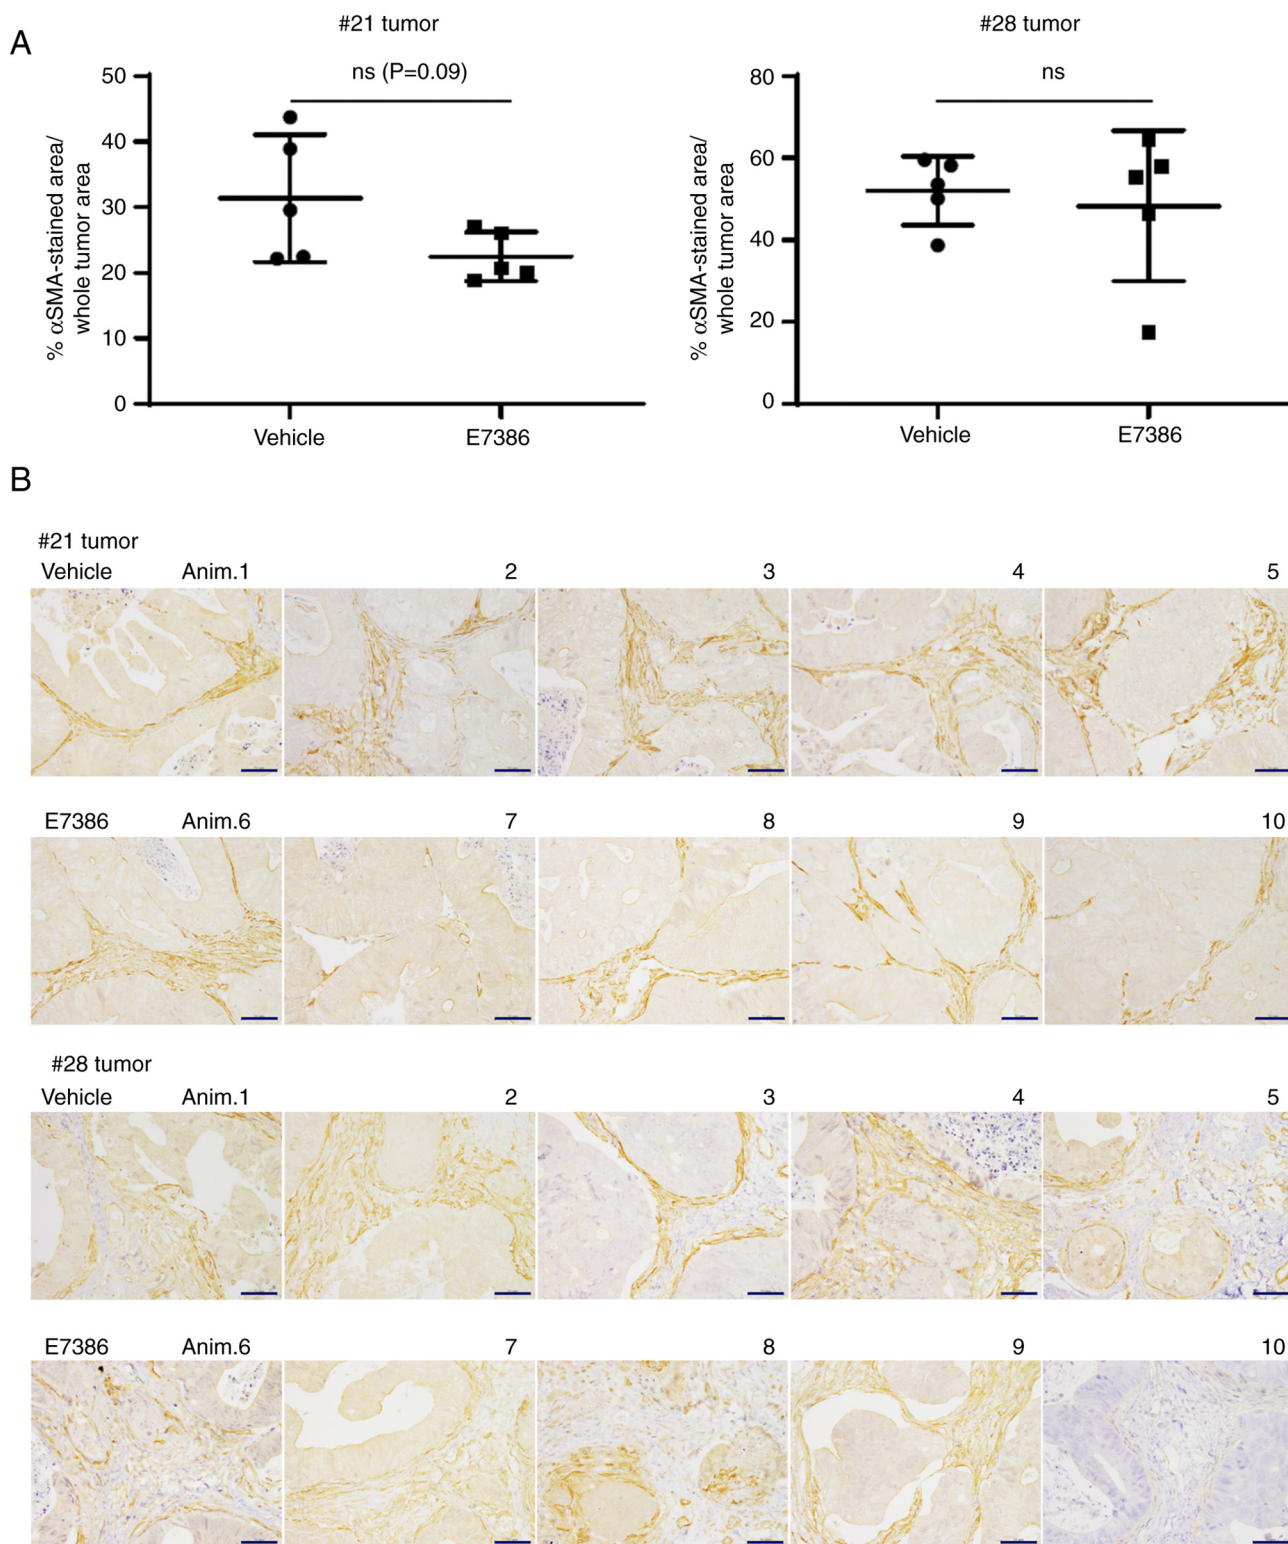

Supplement: Supplementary_Data1.pdf [file Supplementary_Data1.pdf]
