# Supplementary material for: Different types of reactions to E7386 among colorectal cancer patient-derived organoids and corresponding CAFs
Source: PubMed Central journal article supplement — Oncol Lett. 2022 May 23;24(1):221. doi: 10.3892/ol.2022.13342 (PMC9178669; doi:10.3892/ol.2022.13342), 2022-05-23
Supplement: Supplementary_Data2.pdf [file Supplementary_Data2.pdf]

Table SI. Primer sequences used for reverse transcription-quantitative PCR.

| Gene           | Forward (5'-3')        | Reverse (5'-3')        |
|----------------|------------------------|------------------------|
| <i>β-ACTIN</i> | AAACTGGAACGGTGAAGGTG   | AGAGAAGTGGGGTGGCTTTT   |
| <i>CHAC1</i>   | CCAGTGCTGCTGCTAACC     | CTACTATCCCTCATCCAGCCT  |
| <i>ULBP1</i>   | GTCACAAAGTCAGAGATGGTGG | TAGTGGGATTGCGGGATTGA   |
| <i>PCK2</i>    | GCAGCAGAACACAAAGGGAA   | GATCCAGTCTAGCACCCGAG   |
| <i>VLDLR</i>   | GCAGGGCAGATGTCACTACT   | TCTTCAGACAGGTGTAGTGGAG |
| <i>FDPS</i>    | AGGACAACAAATGCAGCTGG   | GGTGCTGCGTACTGTTCAAT   |
| <i>HDAC2</i>   | TAGATGGGTGAGAGTGGTGC   | ACAGAGGCATCAAGATCCCC   |
| <i>ACTA2</i>   | CTGTTCCAGCCATCCTTCAT   | GCTGGAAGGTGGACAGAGAG   |

CHAC1, glutathione-specific  $\gamma$ -glutamylcyclotransferase 1; ULBP1, UL16 binding protein 1; PCK2, phosphoenolpyruvate carboxykinase 2; VLDLR, very low density lipoprotein receptor; FDPS, farnesyl diphosphate synthase; HDAC2, histone deacetylase 2.

Table SII. Upregulated genes associated with E7386 concentrations 24 h after the addition of E7386 to the colorectal cancer organoids compared with the control.

| Name          | Correlation | GB_ACC    | GENE_SYMBOL | ENSEMBL_ID          |
|---------------|-------------|-----------|-------------|---------------------|
| A_33_P3376971 | 0.91        | NM_024111 | CHAC1       | ENST0000061796<br>1 |
| A_23_P41114   | 0.91        | NM_005213 | CSTA        | ENST0000026447<br>4 |
| A_33_P3376965 | 0.91        | NM_024111 | CHAC1       | ENST0000044418<br>9 |
| A_23_P259692  | 0.90        | NM_058179 | PSAT1       | ENST0000037658<br>8 |
| A_23_P17354   | 0.88        | NM_024034 | GDAP1L1     |                     |
| A_24_P100761  | 0.86        | NM_017679 | BCAS3       | ENST0000058729<br>4 |
| A_33_P3237634 | 0.86        | NM_004089 | TSC22D3     | ENST0000037238<br>3 |
| A_33_P3422802 | 0.86        | NM_025218 | ULBP1       | ENST0000022970<br>8 |
| A_23_P104318  | 0.84        | NM_019058 | DDIT4       | ENST0000030736<br>5 |
| A_33_P3422810 | 0.82        | NM_025218 | ULBP1       | ENST0000022970<br>8 |
| A_23_P128817  | 0.81        | NM_004563 | PCK2        | ENST0000055950<br>3 |
| A_21_P0007913 | 0.81        |           |             | ENST0000041359<br>1 |
| A_33_P3413905 | 0.81        | NM_024866 | ADM2        | ENST0000039573<br>8 |
| A_33_P3416414 | 0.81        |           |             | ENST0000051896<br>8 |
| A_23_P421811  | 0.81        | NM_152503 | MROH8       | ENST0000046609<br>1 |

|                    |      |                  |                    |                     |
|--------------------|------|------------------|--------------------|---------------------|
| A_23_P145694       | 0.80 | NM_001673        | ASNS               |                     |
| A_23_P259621       | 0.80 | NM_032464        | LAT2               | ENST0000046094<br>3 |
| A_23_P37892        | 0.80 | NM_133443        | GPT2               | ENST0000056919<br>3 |
| A_23_P126103       | 0.80 | NM_001902        | CTH                | ENST0000037093<br>8 |
| A_19_P0031580<br>4 | 0.80 | NR_015375        | VLDLR-AS1          |                     |
| A_33_P3363188      | 0.79 | NR_033856        | FLJ43315           |                     |
| A_21_P0013514      | 0.79 |                  | XLOC_12_01450<br>4 |                     |
| A_23_P85783        | 0.79 | NM_006623        | PHGDH              | ENST0000036940<br>7 |
| A_23_P161634       | 0.79 | NM_025128        | MUS81              | ENST0000052464<br>7 |
| A_23_P300847       | 0.78 | AF469204         | MIR1247            | ENST0000055588<br>2 |
| A_33_P3353051      | 0.78 | NM_00128748<br>3 | C6orf48            |                     |
| A_21_P0013512      | 0.77 |                  |                    | ENST0000051831<br>1 |
| A_33_P3297444      | 0.77 | NM_032548        | ABTB1              | ENST0000046443<br>1 |
| A_21_P0010773      | 0.77 | NR_033856        | FLJ43315           | ENST0000062320<br>1 |
| A_21_P0013475      | 0.76 |                  |                    | ENST0000051110<br>3 |
| A_33_P3268532      | 0.76 | NM_00101807<br>3 | PCK2               | ENST0000039697<br>3 |
| A_33_P3352432      | 0.76 | NM_00112989<br>9 | KRBOX4             |                     |
| A_23_P157766       | 0.75 | NM_00103939      | SPATA6L            | ENST0000040686      |

|                    |      |                  |                           |                     |
|--------------------|------|------------------|---------------------------|---------------------|
|                    |      | 5                |                           | 1                   |
| A_23_P205913       | 0.75 | NM_004727        | SLC24A1                   |                     |
| A_24_P221485       | 0.75 |                  |                           | ENST0000043913<br>2 |
| A_23_P108342       | 0.75 | NM_016536        | ZNF571                    | ENST0000035874<br>4 |
| A_23_P21134        | 0.75 | NM_004083        | DDIT3                     | ENST0000061820<br>6 |
| A_22_P0002392<br>8 | 0.75 | BX647685         | lnc-RP11-<br>293M10.1.1-1 |                     |
| A_24_P235266       | 0.75 | NM_00100155<br>5 | GRB10                     |                     |
| A_19_P0080055<br>5 | 0.74 |                  | lnc-UQCRFS1-7             |                     |
| A_24_P915196       | 0.74 | NM_153045        | C9orf91                   | ENST0000037404<br>9 |
| A_33_P3281408      | 0.73 | NM_00112740<br>1 | YPEL5                     |                     |
| A_23_P43476        | 0.73 | NM_003383        | VLDLR                     |                     |
| A_23_P120316       | 0.72 | NM_006636        | MTHFD2                    |                     |
| A_33_P3240538      | 0.72 | NM_016262        | TUBE1                     | ENST0000036866<br>2 |
| A_33_P3764802      | 0.72 | NM_012241        | SIRT5                     | ENST0000037925<br>0 |
| A_33_P3831730      | 0.72 |                  | lnc-NDUFA4-2              |                     |
| A_33_P3358295      | 0.72 | NM_032548        | ABTB1                     | ENST0000046443<br>1 |
| A_24_P264664       | 0.72 | NM_001271        | CHD2                      | ENST0000039419<br>6 |
| A_21_P0000629      | 0.72 | NR_034072        | SARS                      |                     |
| A_23_P117582       | 0.72 | NM_130469        | JDP2                      |                     |
| A_23_P166051       | 0.72 | NM_031229        | RBCK1                     | ENST0000035628<br>6 |



|                    |      |           |           |                     |
|--------------------|------|-----------|-----------|---------------------|
| A_23_P401106       | 0.72 | NM_002599 | PDE2A     |                     |
| A_23_P387184       | 0.71 | NM_020464 | NHSL1     | ENST0000034350<br>5 |
| A_33_P3276475      | 0.71 | NM_020412 | CHMP1B    | ENST0000052699<br>1 |
| A_33_P3236646      | 0.71 | NM_198551 | MIA3      |                     |
| A_23_P101564       | 0.70 | NM_019113 | FGF21     | ENST0000022215<br>7 |
| A_33_P3389852      | 0.70 | NM_017679 | BCAS3     | ENST0000059035<br>2 |
| A_23_P415401       | 0.70 | NM_001206 | KLF9      | ENST0000037712<br>6 |
| A_23_P11984        | 0.70 | NM_201649 | SLC6A9    |                     |
| A_22_P0000084<br>6 | 0.70 | NR_024398 | ZBED3-AS1 |                     |

Table SIII. Downregulated genes associated with E7386 concentrations 24 h after the addition of E7386 to the colorectal cancer organoids compared with that of the control.

| NAME           | Correlation | GB_ACC       | GENE_SYMBOL  | ENSEMBL_ID      |
|----------------|-------------|--------------|--------------|-----------------|
| A_33_P3253857  | -0.87       |              |              | ENST00000597330 |
| A_33_P3240497  | -0.80       | AK095730     |              |                 |
| A_33_P3522525  | -0.79       | NM_025196    | GRPEL1       | ENST00000504920 |
| A_33_P3309924  | -0.79       | NM_001527    | HDAC2        |                 |
| A_21_P0013202  | -0.78       |              |              | ENST00000453012 |
| A_33_P3214597  | -0.77       | NR_003500    | RP9P         | ENST00000381639 |
| A_32_P179746   | -0.75       | XR_427741    | LOC101929687 |                 |
| A_22_P00004931 | -0.75       |              | lnc-DBX1-1   |                 |
| A_24_P81947    | -0.75       | NM_014325    | CORO1C       | ENST00000420959 |
| A_24_P114183   | -0.74       | NM_002004    | FDPS         |                 |
| A_23_P254573   | -0.73       | NM_014377    | DNAJC2       | ENST00000464253 |
| A_24_P181585   | -0.73       | NM_018509    | LRRC59       | ENST00000225972 |
| A_33_P3220095  | -0.73       | NM_001282933 | ZNF341       |                 |
| A_23_P153086   | -0.73       | NM_024805    | RBFA         | ENST00000593019 |
| A_24_P160440   | -0.73       | NM_181462    | MRPL55       |                 |
| A_23_P111487   | -0.73       | NM_001128853 | SRRT         |                 |
| A_23_P403955   | -0.73       | NM_007375    | TARDBP       | ENST00000611008 |
| A_22_P0001428  | -0.72       |              | lnc-SEPT11-1 |                 |

|                |       |                  |               |                     |
|----------------|-------|------------------|---------------|---------------------|
| 0              |       |                  |               |                     |
| A_32_P45738    | -0.72 | NM_002629        | PGAM1         | ENST0000033482<br>8 |
| A_23_P157072   | -0.72 | NM_00103728<br>3 | EIF3B         | ENST0000047541<br>5 |
| A_33_P3296099  | -0.72 |                  |               |                     |
| A_23_P11859    | -0.71 | NM_016371        | HSD17B7       | ENST0000049445<br>0 |
| A_24_P925314   | -0.71 | NM_000405        | GM2A          | ENST0000035716<br>4 |
| A_22_P00014911 | -0.71 | AI384051         | lnc-SLCO2B1-3 |                     |
| A_33_P3316835  | -0.70 | AK002193         | ZGRF1         | ENST0000026437<br>0 |

Table SIV. Upregulated genes associated with E7386 concentrations 24 h after the addition of E7386 to the cancer-associated fibroblasts.

| Name          | Correlation | GB_ACC    | GENE_SYMBOL        | ENSEMBL_ID          |
|---------------|-------------|-----------|--------------------|---------------------|
| A_21_P0013475 | 0.97        |           |                    | ENST0000051110<br>3 |
| A_21_P0013512 | 0.97        |           |                    | ENST0000051831<br>1 |
| A_23_P145694  | 0.97        | NM_001673 | ASNS               |                     |
| A_21_P0009752 | 0.96        |           | lnc-UQCRFS1-9      |                     |
| A_21_P0013514 | 0.96        |           | XLOC_12_01450<br>4 |                     |
| A_23_P128817  | 0.96        | NM_004563 | PCK2               | ENST0000055950<br>3 |
| A_24_P253251  | 0.96        | NM_003045 | SLC7A1             | ENST0000038075<br>2 |
| A_23_P259692  | 0.96        | NM_058179 | PSAT1              | ENST0000037658<br>8 |
| A_33_P3413905 | 0.96        | NM_024866 | ADM2               | ENST0000039573<br>8 |
| A_23_P85783   | 0.95        | NM_006623 | PHGDH              | ENST0000036940<br>7 |
| A_24_P154948  | 0.95        | NM_002047 | GARS               | ENST0000047039<br>2 |
| A_24_P335620  | 0.95        | NM_003486 | SLC7A5             | ENST0000026162<br>2 |
| A_33_P3416414 | 0.95        |           |                    | ENST0000051896<br>8 |
| A_23_P120316  | 0.94        | NM_006636 | MTHFD2             |                     |
| A_21_P0009753 | 0.94        |           | LINC00662          | ENST0000059067<br>7 |
| A_23_P258964  | 0.94        | NM_013417 | IARS               | ENST0000044302<br>4 |

|                    |      |                  |              |                     |
|--------------------|------|------------------|--------------|---------------------|
| A_23_P22224        | 0.94 | NM_004095        | EIF4EBP1     | ENST0000033882<br>5 |
| A_19_P0031562<br>7 | 0.93 | XR_428440        | LOC101930053 |                     |
| A_23_P121875       | 0.93 | NM_022483        | C5orf28      | ENST0000051208<br>5 |
| A_23_P65262        | 0.93 | NM_00127843<br>2 | N4BP2L2      | ENST0000050907<br>6 |
| A_24_P270728       | 0.93 | NM_00104248<br>3 | NUPR1        |                     |
| A_23_P165989       | 0.93 | NM_080749        | NEURL2       | ENST0000037251<br>8 |
| A_23_P70168        | 0.93 | NM_152295        | TARS         |                     |
| A_33_P3209351      | 0.93 | NM_013417        | IARS         | ENST0000037562<br>7 |
| A_23_P120933       | 0.93 | NM_001675        | ATF4         | ENST0000033730<br>4 |
| A_33_P3535649      | 0.93 | NM_032296        | FLYWCH1      | ENST0000041628<br>8 |
| A_33_P3402615      | 0.93 | NM_201649        | SLC6A9       |                     |
| A_21_P0000646      | 0.93 | NR_034148        | LINC00900    |                     |
| A_33_P3268532      | 0.93 | NM_00101807<br>3 | PCK2         | ENST0000039697<br>3 |
| A_21_P0000629      | 0.92 | NR_034072        | SARS         |                     |
| A_33_P3240538      | 0.92 | NM_016262        | TUBE1        | ENST0000036866<br>2 |
| A_23_P64661        | 0.92 | NM_032496        | ARHGAP9      | ENST0000043004<br>1 |
| A_23_P43317        | 0.92 | NM_021619        | PRDM12       | ENST0000025300<br>8 |
| A_23_P9614         | 0.92 | NM_020142        | NDUFA4L2     | ENST0000055517<br>3 |
| A_23_P149259       | 0.92 | NM_032323        | TMEM79       | ENST0000049588      |

|                    |      |                  |               |                     |
|--------------------|------|------------------|---------------|---------------------|
|                    |      |                  |               | 1                   |
| A_33_P3353030      | 0.92 | NM_003353        | UCN           | ENST0000029609<br>9 |
| A_23_P15876        | 0.91 | NM_052947        | ALPK2         | ENST0000036167<br>3 |
| A_24_P221485       | 0.91 |                  |               | ENST0000043913<br>2 |
| A_23_P166306       | 0.91 | NM_000071        | CBS           | ENST0000061770<br>6 |
| A_21_P0014094      | 0.91 | AK096649         |               |                     |
| A_23_P340722       | 0.91 | NM_007235        | XPOT          | ENST0000044942<br>6 |
| A_33_P3342430      | 0.91 |                  |               | ENST0000044327<br>9 |
| A_23_P161399       | 0.91 | NM_130439        | MXI1          | ENST0000048556<br>6 |
| A_23_P150903       | 0.91 | NM_018099        | FAR2          | ENST0000018237<br>7 |
| A_24_P50753        | 0.91 | NM_199040        | NUDT4         |                     |
| A_22_P0000827<br>2 | 0.91 | NR_110453        | CRNDE         |                     |
| A_21_P0009754      | 0.91 |                  | lnc-UQCRFS1-9 |                     |
| A_24_P364057       | 0.91 | NM_032930        | C11orf70      | ENST0000053065<br>9 |
| A_23_P353125       | 0.91 | NM_152597        | FSIP1         | ENST0000035022<br>1 |
| A_33_P3353051      | 0.91 | NM_00128748<br>3 | C6orf48       |                     |
| A_23_P257578       | 0.91 | NM_00103523<br>5 | SRA1          |                     |
| A_33_P3322288      | 0.91 | NM_00113443<br>3 | AZI2          | ENST0000041416<br>2 |
| A_23_P418485       | 0.91 | NM_152587        | C11orf65      | ENST0000039308      |

|                    |      |                  |                          |                     |
|--------------------|------|------------------|--------------------------|---------------------|
|                    |      |                  |                          | 4                   |
| A_33_P3385957      | 0.91 | NM_012263        | TLL1                     | ENST0000044076<br>1 |
| A_22_P0001337<br>6 | 0.91 | XM_00672259<br>4 | lnc-RP11-<br>17M16.1.1-1 |                     |
| A_24_P134834       | 0.90 | NM_032276        | RHBDD1                   | ENST0000039206<br>2 |
| A_33_P3363188      | 0.90 | NR_033856        | FLJ43315                 |                     |
| A_23_P35082        | 0.90 | NM_031459        | SESN2                    | ENST0000025306<br>3 |
| A_23_P422766       | 0.90 | NM_172193        | KLHDC1                   | ENST0000035933<br>2 |
| A_33_P3764802      | 0.90 | NM_012241        | SIRT5                    | ENST0000037925<br>0 |
| A_22_P0000827<br>1 | 0.90 | NR_110454        | CRNDE                    |                     |
| A_24_P95439        | 0.90 | NM_00101443<br>7 | CARS                     |                     |
| A_24_P115700       | 0.90 | NM_078470        | COX15                    | ENST0000037048<br>3 |
| A_23_P115223       | 0.90 | NM_006118        | HAX1                     | ENST0000045791<br>8 |
| A_32_P54503        | 0.90 | NR_024451        | JHDM1D-AS1               |                     |
| A_19_P0032253<br>3 | 0.90 | NR_110453        | CRNDE                    | ENST0000056091<br>2 |

Table SV. Downregulated genes associated with E7386 concentration 24 h after the addition of E7386 to the cancer-associated fibroblasts.

| Name          | Correlation | GB_ACC       | GENE_SYMBOL | ENSEMBL_ID      |
|---------------|-------------|--------------|-------------|-----------------|
| A_24_P101101  | -0.94       |              |             | ENST00000437414 |
| A_23_P64860   | -0.94       | NM_003006    | SELPLG      | ENST00000550948 |
| A_24_P276888  | -0.94       | NM_001199803 | CENPO       | ENST00000260662 |
| A_32_P150735  | -0.93       |              |             |                 |
| A_32_P106732  | -0.93       | NM_020937    | FANCM       | ENST00000267430 |
| A_23_P212639  | -0.93       | NM_004593    | TRA2B       | ENST00000456380 |
| A_24_P203407  | -0.93       | NM_001080472 | FITM2       |                 |
| A_24_P323104  | -0.93       | NM_005219    | DIAPH1      | ENST00000253811 |
| A_23_P51085   | -0.93       | NM_020675    | SPC25       | ENST00000611144 |
| A_23_P102109  | -0.93       | NM_006000    | TUBA4A      | ENST00000486997 |
| A_23_P81650   | -0.92       | NM_020199    | C5orf15     | ENST00000231512 |
| A_32_P119197  | -0.92       | NM_001043352 | TPM3        |                 |
| A_33_P3392177 | -0.92       | NM_001256023 | CLIC5       | ENST00000484572 |
| A_23_P30884   | -0.92       | NM_001288    | CLIC1       | ENST00000614673 |
| A_24_P942604  | -0.92       | NM_006306    | SMC1A       | ENST00000375340 |
| A_33_P3327165 | -0.92       | NM_206886    | CCDC18      | ENST00000447456 |
| A_23_P308581  | -0.91       | NM_033112    | RRP36       | ENST00000244496 |
| A_23_P45294   | -0.91       | NM_207318    | FAM199X     | ENST00000299906 |
| A_23_P88731   | -0.91       | NM_002875    | RAD51       |                 |
| A_33_P3405500 | -0.90       | NM_014363    | SACS        | ENST00000382292 |
| A_24_P349965  | -0.90       | NM_007109    | TCF19       | ENST00000400401 |
| A_23_P434900  | -0.90       | NM_144570    | HN1L        | ENST00000248098 |
| A_24_P181585  | -0.90       | NM_018509    | LRRC59      | ENST00000225972 |



Table SVI. Summary of the immunohistochemistry staining data for phosphoenolpyruvate carboxykinase 2, very low density lipoprotein receptor,  $\beta$ -catenin and  $\alpha$ -smooth muscle actin expression in patient-derived xenografts from cases 21, 28 and 32 after treatment with E7380 twice a day for 14 days.

| A, PCK2 (cytoplasmic granular positivity in carcinoma cells)                        |   |    |                    |   |    |                    |   |    |     |
|-------------------------------------------------------------------------------------|---|----|--------------------|---|----|--------------------|---|----|-----|
| Case #21                                                                            |   |    | Case #28           |   |    | Case #32           |   |    |     |
| Grade                                                                               | + | ++ | +++                | + | ++ | +++                | + | ++ | +++ |
| E7386 0 mg/kg                                                                       | 2 | 3  | 0                  | 5 | 0  | 0                  | 1 | 2  | 0   |
| E7386 50 mg/kg                                                                      | 0 | 2  | 3                  | 5 | 0  | 0                  | 2 | 1  | 0   |
| B, VLDLR (membranous positivity on apical surface in carcinoma cells)               |   |    |                    |   |    |                    |   |    |     |
| Case #21                                                                            |   |    | Case #28           |   |    | Case #32 (P=0.014) |   |    |     |
| Grade                                                                               | + | ++ | +++                | + | ++ | +++                | + | ++ | +++ |
| E7386 0 mg/kg                                                                       | 5 | 0  | 0                  | 5 | 0  | 0                  | 0 | 3  | 0   |
| E7386 50 mg/kg                                                                      | 3 | 2  | 0                  | 5 | 0  | 0                  | 0 | 0  | 3   |
| C, $\beta$ -catenin (nuclear positivity in carcinoma cells)                         |   |    |                    |   |    |                    |   |    |     |
| Case #21                                                                            |   |    | Case #28 (P=0.058) |   |    | Case #32           |   |    |     |
| Grade                                                                               | + | ++ | +++                | + | ++ | +++                | + | ++ | +++ |
| E7386 0 mg/kg                                                                       | 0 | 3  | 2                  | 0 | 1  | 4                  | 0 | 2  | 1   |
| E7386 50 mg/kg                                                                      | 0 | 1  | 4                  | 0 | 4  | 1                  | 0 | 0  | 3   |
| D, $\alpha$ SMA (cytoplasmic positivity in fibroblasts surrounding carcinoma cells) |   |    |                    |   |    |                    |   |    |     |
| Case #21                                                                            |   |    | Case #28 (P=0.058) |   |    | Case #32           |   |    |     |
| Grade                                                                               | + | ++ | +++                | + | ++ | +++                | + | ++ | +++ |
| E7386 0 mg/kg                                                                       | 0 | 3  | 2                  | 1 | 4  | 0                  | 1 | 2  | 0   |
| E7386 50 mg/kg                                                                      | 2 | 2  | 1                  | 4 | 1  | 0                  | 0 | 3  | 0   |

+, <25%; ++, 25-75%; +++, 75%< positivity in sites of localization.
